# Supplementary material
Source: publisher figshare collection journal article supplement (https://karger.figshare.com/ndownloader/files/35916209)
Supplement: Supplementary file 1 [file 35916209]

**Supplement Table 4.** Associations between the thickness of inner plexiform layer by each ETDRS sector with gender, age (per decade), and axial length

| **ETDRS Sector** | | **Male vs female** | | | | | | **Age (per decade), year** | | | | | | **Axial length, (mm)** | | | | | |
| --- | --- | --- | --- | --- | --- | --- | --- | --- | --- | --- | --- | --- | --- | --- | --- | --- | --- | --- | --- |
| Coefficient | | 95% CI | | P Value | | Coefficient | | 95% CI | | P Value | | Coefficient | | 95% CI | | P Value | |
| **Central area** | | 0.86 | | 0.25,  1.48 | | 0.006 | | -0.11 | | -0.30,  0.08 | | 0.256 | | 0.93 | | 0.55,  1.31 | | <0.001 | |
| **Inner ring** | | | |  | |  | |  | |  | |  | |  | |  | |  | |
| Inner superior | | 0.98 | | 0.36,  1.60 | | 0.002 | | -0.35 | | -0.55,  -0.16 | | <0.001 | | 0.33 | | -0.05,  0.71 | | 0.090 | |
| Inner nasal | | 1.07 | | 0.35,  1.78 | | 0.004 | | -0.50 | | -0.72,  -0.28 | | <0.001 | | 0.57 | | 0.13,  1.01 | | 0.012 | |
| Inner inferior | | 0.84 | | 0.21,  1.47 | | 0.009 | | -0.42 | | -0.61,  -0.22 | | <0.001 | | 0.55 | | 0.16,  0.93 | | 0.006 | |
| Inner temporal | | 1.0 | | 0.39,  1.70 | | 0.002 | | -0.28 | | -0.48,  -0.07 | | 0.008 | | 0.73 | | 0.33,  1.14 | | <0.001 | |
| **Outer ring** | | | |  | |  | |  | |  | |  | |  | |  | |  | |
| Outer superior | | 0.54 | | -0.06,  1.14 | | 0.078 | | -0.33 | | -0.51,  -0.14 | | 0.001 | | -0.40 | | -0.77,  -0.03 | | 0.034 | |
| Outer nasal | | 0.71 | | 0.20,  1.21 | | 0.006 | | -0.40 | | -0.56,  -0.25 | | <0.001 | | -0.55 | | -0.86,  -0.24 | | 0.001 | |
| Outer inferior | | 0.40 | | -0.18,  0.97 | | 0.176 | | -0.33 | | -0.51,  -0.15 | | <0.001 | | -0.50 | | -0.86,  -0.15 | | 0.005 | |
| Outer temporal | 1.02 | | 0.50,  1.53 | | <0.001 | | -0.40 | | -0.56,  -0.24 | | <0.001 | | -0.38 | | -0.70,  -0.06 | | 0.019 | |
| *Note: CI = confidence interval, mm = millimeter* | | | | | | | | | | | | | | | | | | | |
